# Supplementary material
Source: MDPI journal article supplement (https://www.mdpi.com/2073-4441/16/1/116)
Supplement: s1 [file s1]

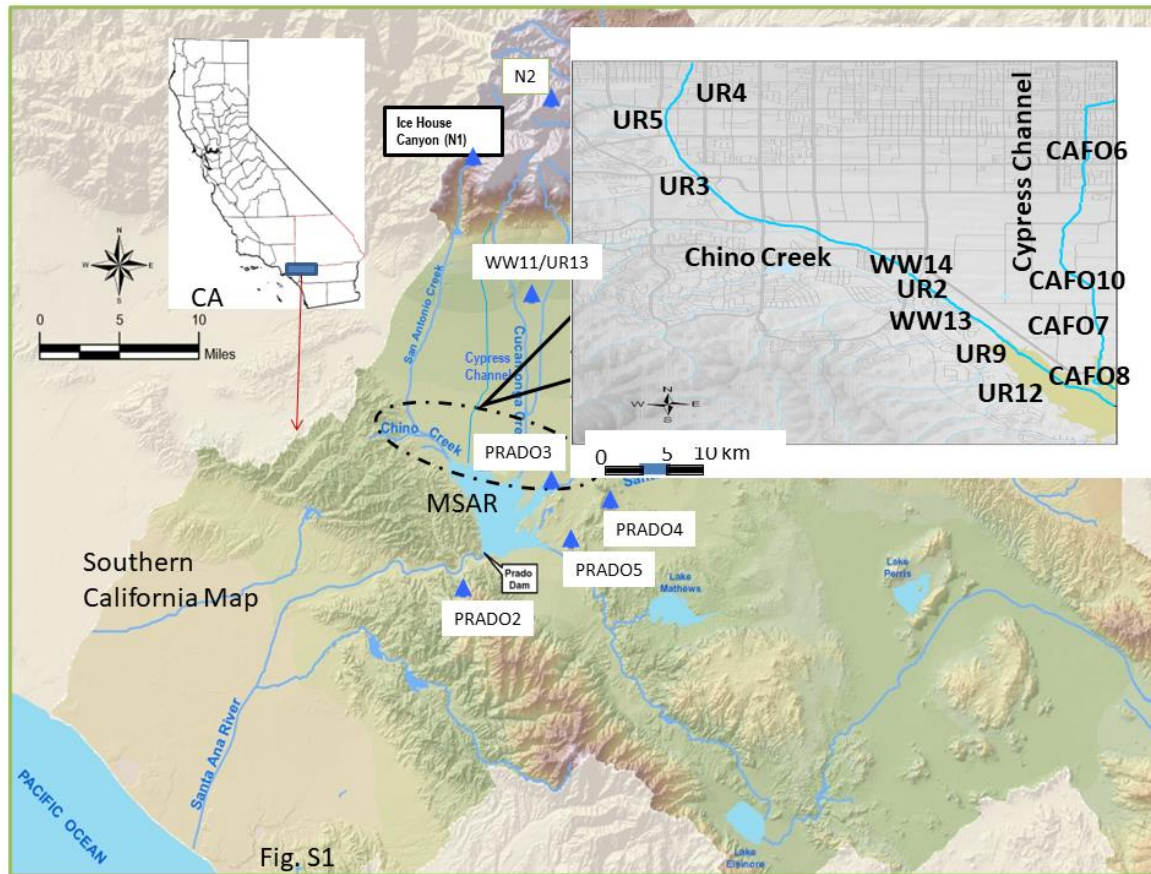

Figure S1: Sampling locations in the watershed used for the study.

Table S1. Sampling Locations for MSAR *Enterococcus* Evaluation Study.

| Site # | Zones           | No of samples | Site locations                                      | Land use                           | Geographic positioning system (GPS)                                    |
|--------|-----------------|---------------|-----------------------------------------------------|------------------------------------|------------------------------------------------------------------------|
| N1     | 5-Natural sites | 12            | Ice House Canyon                                    | Open Space                         | N34°15.057min.;W117° 37.977min;1447 m elevation                        |
| N2     |                 | 12            | Cucamonga Creek. @OCWD Ponds                        | Open Space                         | San Bernardino County Flood Control District (SBCFCD); 207 m elevation |
| UR2    | 1-urban runoff  | 12            | Chino Creek @ Central Ave.                          | Urban runoff                       | N33° 58.420min.; W117° 41.302min;174 m elevation                       |
| UR3    |                 | 12            | Chino Creek @ Schaefer Ave.                         | Urban runoff                       | N34° 00.246min.; W117° 43.628min;207 m elevation                       |
| UR4    |                 | 12            | San Antonio Wash @ County Drive                     | Urban runoff + Commercial wash out | N30° 01.543min.; W117° 43.652min;222 m elevation;                      |
| UR5    |                 | 12            | Chino Creek. @ Riverside Drive                      | Urban runoff                       | N34° 01.144min.; W117° 44.204min; 207 m elevation;                     |
| UR9    |                 | 12            | Big League Dreams storm drain                       | Urban runoff                       | N33° 57.364min.; W117° 40.788min;163 m elevation;                      |
| UR13   |                 | 12            | Cucamonga Creek @ Regional Water Recycling Plant #1 | Urban runoff+ wastewater           | N34°;01.853min; W117° 35.946min; Altitude: 246 m                       |
| UR12   |                 | 12            | Chino Creek @ Pine Ave.                             | Urban runoff+ wastewater           | N33°56.941min.;W117° 39.986min;155 m elevation;                        |
| CAFO6  | 2-Agri-runoff   | 12            | Cypress Channel @ Schaefer Ave.                     | Agricultural runoff                | N34° 00.262min.; W117° 39.766min, 208 m elevation;                     |

|         |                           |                                |                                                                         |                                                                      |                                                   |
|---------|---------------------------|--------------------------------|-------------------------------------------------------------------------|----------------------------------------------------------------------|---------------------------------------------------|
| CAFO7   | 12                        | Cypress Channel @ Kimball Ave. | Agricultural runoff                                                     | N33° 58.113min.; W117° 39.624min, 177m elevation;                    |                                                   |
| CAFO8   | 12                        | Cypress Channel @ Golf Course  | Agricultural runoff                                                     | N33° 57.057min.; W117° 39.555min;160 m elevation;                    |                                                   |
| CAFO10  | 4                         | Dirt channel on Kimball        | Agricultural Runoff                                                     | N33°58.109min.;W117° 40.286min 184 m elevation;                      |                                                   |
| UR13    | 4-WWTPs                   | 6                              | Cucamonga Creek @ Regional Water Recycling Plant #1                     | Effluent from wastewater treatment plant and urban runoff            | N34°;01.853min; W117° 35.946min; Altitude:246 m   |
| WW13    |                           | 6                              | Inland Empire Utilities Agency (IEUA) Regional Water Recycling Plant #5 | Effluent from wastewater treatment plant                             | N33° 57.840min.; W117° 40.826min;180 m elevation; |
| WW14    |                           | 6                              | IEUA Carbon Canyon Waste Reclamation Facility (CCWRF)                   | Effluent from wastewater treatment plant                             | N33° 58.799min.; W117° 41.655min;184 m elevation; |
| PRADO2  | 3-Prado Recreational Park | 12                             | Santa Ana River @ Prado Dam                                             | Urban Runoff+Agr                                                     | N33°;54.737min; W117° 38.711min Altitude: 141 m.  |
| PRADO33 |                           | 12                             | Prado Park outlet                                                       | Urban Runoff+ waste water discharge                                  | N33°;56.402min; W117° 38.763min Altitude:166 m    |
| PRADO5  |                           | 12                             | Santa Ana River @ River road                                            | Urban Runoff+Agr                                                     | N33°;55.405min; W117° 35.894min Altitude:155 m.   |
| PRADO4  |                           | 12                             | OCWD (Prado)Wetlands Effluent                                           | Wetland treated (bacteria loaded) Orange County Water District (OCWD | N33°;54.737min; W117° 38.711min Altitude: 141 m   |

Table S2. Primers and PCR conditions used in this study

| Primer type                              | Positive control           | Direction | Sequence (5'-3')       | Primer conc (pmol) | Annealing temp (°C) | Product size (bp) |
|------------------------------------------|----------------------------|-----------|------------------------|--------------------|---------------------|-------------------|
| Virulence gene (multiplex PCR)           |                            |           |                        |                    |                     |                   |
| <i>asa1</i>                              | <i>E. faecalis</i> MMH 594 | F         | GCACGCTATTACGAACTATGA  | 0.1                | 56                  | 375               |
|                                          |                            | R         | TAAGAAAGAACATCACCACGA  |                    |                     |                   |
| <i>gelE</i>                              | <i>E. faecalis</i> MMH 594 | F         | TATGACAATGCTTTTGGGAT   | 0.1                | 56                  | 213               |
|                                          |                            | R         | AGATGCACCCGAAATAATATA  |                    |                     |                   |
| <i>cylA</i>                              | <i>E. faecalis</i> MMH 594 | F         | ACTCGGGGATTGATAGGC     | 0.2                | 56                  | 688               |
|                                          |                            | R         | GCTGCTAAAGCTGCGCTT     |                    |                     |                   |
| <i>esp</i>                               | <i>E. faecalis</i> MMH 594 | F         | AGATTTCATCTTTGATTCTTGG | 0.2                | 56                  | 510               |
|                                          |                            | R         | AATTGATTCTTTAGCATCTGG  |                    |                     |                   |
| Antibiotic resistance gene Multiplex PCR |                            |           |                        |                    |                     |                   |
| <i>tet</i> (A) group I                   | <i>E. coli</i> HB101(RP1)  | F         | GCTACATCCTGCTTGCCCTTC  | 1                  | 55                  | 210               |
|                                          |                            | R         | CATAGATCGCCGTGAAGAGG   |                    |                     |                   |
| <i>tet</i> (C) group I                   | <i>E. coli</i> DO7(pBR322) | F         | CTTGAGAGCCTTCAACCCAG   | 0.25               | 55                  | 418               |
|                                          |                            | R         | ATGGTCGTCATCTACCTGCC   |                    |                     |                   |

|                         |                                         |   |                       |      |    |     |
|-------------------------|-----------------------------------------|---|-----------------------|------|----|-----|
| <i>tet</i> (K) group II | <i>Bacillus subtilis</i><br>BD99(pT181) | F | TCGATAGGAACAGCAGTA    | 1.25 | 55 | 169 |
|                         |                                         | R | CAGCAGATCCTACTCCTT    |      |    |     |
| <i>tet</i> (O) group II | Cloned plasmid (O)                      | F | AACTTAGGCATTCTGGCTCAC | 1.25 | 55 | 515 |
|                         | pGEM-tet                                | R | TCCCACTGTTCCATATCGTCA |      |    |     |
| <i>tet</i> (S) group II | Cloned plasmid pAT451                   | F | CATAGACAAGCCGTTGACC   | 0.5  | 55 | 667 |
|                         |                                         | R | ATGTTTTTGGAAACGCCAGAG |      |    |     |
| <i>tet</i> (Q) group I  | Cloned plasmid pBT-1                    | F | TTATACTTCCTCCGGCATCG  | 1.25 | 55 | 904 |
|                         |                                         | R | ATCGGTTTCGAGAATGTCCAC |      |    |     |

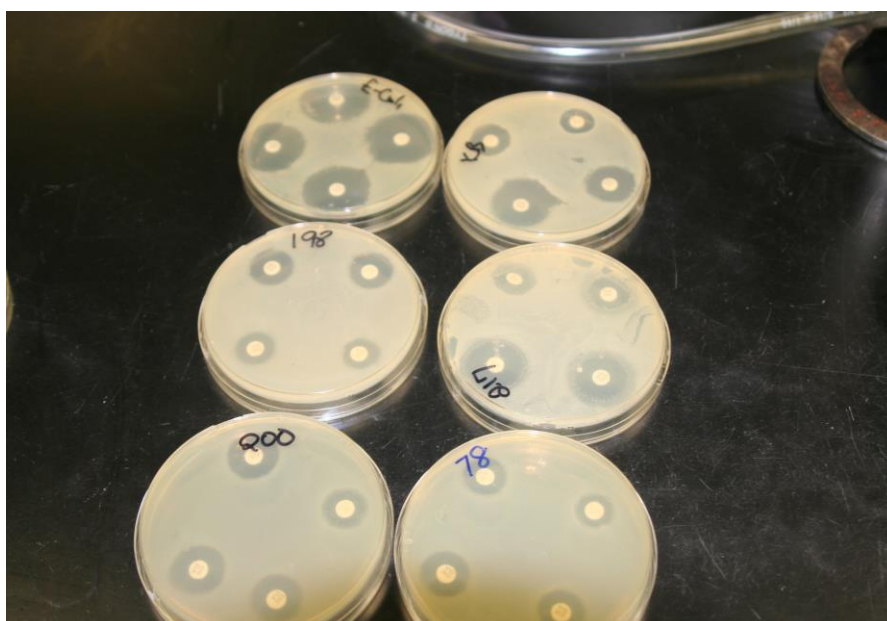

Figure S2. Disk diffusion assay displaying antibiotics resistance
